# Supplementary material for: Role and mechanism of miR-222 in arsenic-transformed cells for inducing tumor growth
Source: PubMed Central journal article supplement (PMC4951251; doi:10.18632/oncotarget.7525), 2016-02-20
Supplement: oncotarget-07-17805-s001.pdf [file oncotarget-07-17805-s001.pdf]

## Role and mechanism of miR-222 in arsenic-transformed cells for inducing tumor growth

### Supplementary Materials

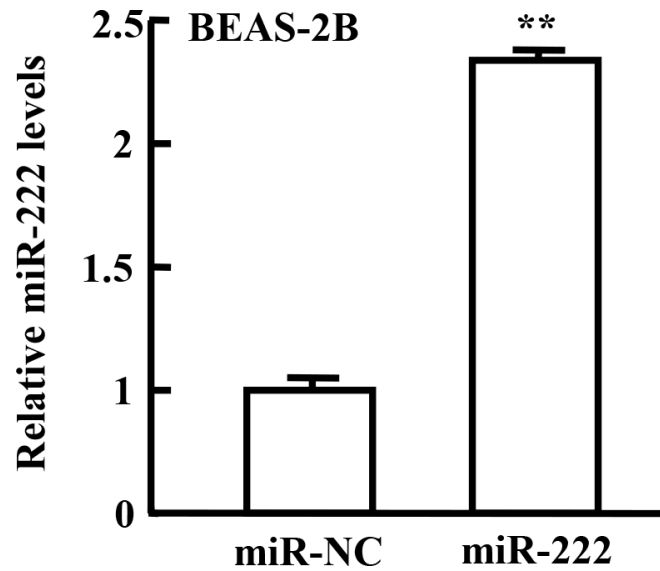

**Supplementary Figure S1: miR-222 levels were increased in BEAS-2B cells transfected with miR-222 mimics.** BEAS-2B cells were transfected with miR-NC or miR-222 mimic. The levels of miR-222 in these cells were analyzed using RT-qPCR 48 h after the transfection. \*\*indicates significant difference compared to the control cells ( $P < 0.01$ ).
